# Supplementary material
Source: publisher figshare collection journal article supplement (https://karger.figshare.com/ndownloader/files/33157322)
Supplement: Supplementary file 1 [file 33157322]

**Table S3**. Exonic variants (ExonVar) per sample according to their type

| **Type of variations** | **P1** | **P2** | **P3** | **P4** | **P5** | **P6** | **P7** | **P8** | **P9** | **P10** |
| --- | --- | --- | --- | --- | --- | --- | --- | --- | --- | --- |
| frameshift detetion | 141 | 144 | 132 | 154 | 144 | 148 | 143 | 154 | 138 | 145 |
| frameshift insertion | 102 | 109 | 97 | 101 | 110 | 96 | 107 | 106 | 107 | 109 |
| nonframeshift deletion | 207 | 203 | 198 | 213 | 206 | 192 | 202 | 212 | 205 | 217 |
| nonframeshift insertion | 174 | 151 | 158 | 173 | 179 | 175 | 162 | 174 | 175 | 172 |
| nonsynonymous SNV | 10862 | 10787 | 10569 | 11083 | 10962 | 10884 | 10529 | 11048 | 10977 | 11109 |
| stopgain | 104 | 102 | 81 | 104 | 103 | 93 | 97 | 93 | 96 | 96 |
| stoploss | 15 | 14 | 9 | 12 | 15 | 16 | 14 | 11 | 14 | 10 |
| synonymous SNV | 11798 | 11545 | 11388 | 11806 | 12107 | 11845 | 11339 | 11959 | 11719 | 11739 |
| . | 140712 | 126509 | 133647 | 327284 | 274742 | 250779 | 248097 | 370928 | 342488 | 272771 |
| unknown | 213 | 207 | 272 | 232 | 219 | 226 | 245 | 248 | 208 | 235 |
